# Supplementary material for: Comment on "Weibel instability in a plasma with nonzero external magnetic field" by O. A. Pokhotelov and M. A. Balikhin, Ann. Geophysicae, 30, 1051–1054, (2012)
Source: Copernicus journal article supplement (doi:10.5194/egusphere-2025-1703), 2025-04-28
Supplement: Supplementary file [file egusphere-2025-1703-RC1-supplement.pdf]

### Report on egusphere-2025-1703

Without expressing my opinion regarding the correctness or incorrectness of the expressions in Ann. Geophysicae, 30, 1051–1054, (2012), I should note that the derivation in the Appendix of the Comment is extremely inaccurate. Eq. (A1) is written for the Fourier components but contains the factor  $\exp(-i\omega t + ikz)$ , which should not be there. Eq. (A3) contains  $\delta$  in the right-hand side. What is this  $\delta$ ? Upon substitution of (A7) into (B3), the factor 1/2 is lost. Substitution of (C14) into (C5) does not seem to be correct:

$$\begin{aligned} & -\omega \frac{v_{T\perp}^2}{v_{T\parallel}^2} \pm \omega_c \left( 1 - \frac{v_{T\perp}^2}{v_{T\parallel}^2} \right) \\ &= \frac{T_{\perp}}{T_{\parallel}} \left( -\omega \pm \omega_c \left( \frac{T_{\parallel}}{T_{\perp}} - 1 \right) \right), \quad \text{Pokhotelov and Balikhin} \\ &\neq \frac{T_{\perp}}{T_{\parallel}} \left( -\omega \pm \omega_c \frac{T_{\parallel}}{T_{\perp}} \left( \frac{T_{\parallel}}{T_{\perp}} - 1 \right) \right), \quad \text{this comment} \end{aligned}$$

There is no reason to publish the comment.
